# Supplementary material
Source: publisher figshare collection journal article supplement (https://future-science-group.figshare.com/ndownloader/files/29147859)
Supplement: Supplementary file 1 [file 29147859]

**Supplementary Table S1**

**List and sequence of primers used in Semiquantitative PCR Studies**

| **List of primers** | | | | |
| --- | --- | --- | --- | --- |
| S.No. | Gene | Length | Temp. | Sequence of primer |
| 1 | LD Trypanothione reductase (TryR) | 220 bp | 62 | Forward: TGGAACGCGG CCGTCACGCA  Reverse: TCTTCCAGTTGGGGCAGAGC |
| 2 | Ornithine decarboxylase (ODC) | 190 bp | 60 | Forward: CCTCTGTTGCATCCAGTCAG  Reverse: GAAAACCTCACAAACGGCAG |
| 3 | Trypanothione Synthase (TRY S) | 220 bp | 62 | Forward: CGAACTGGCTTGACATGAAC  Reverse: GCAGGTGAAACTCGTGATTTG |
| 4 | Spermidine synthase (SPDSYN) | 190 bp | 58 | Forward: TTCTGTATGACCAACCCACC  Reverse: TCTCATGGTACACAAACTCGTC |
| 5 | Amino acid permease (AAP3) | 220 bp | 62 | Forward: CCTTTGCGATGAACATGCTG  Reverse: GATGCTCGGGATGAACAGAC |
| 6 | LD Multi drug resistance protein (MDR1) | 200 bp | 60 | Forward: GCAAATGACTTCCTGAACGC  Reverse: TCACACCATTCACTTCCCAC |
| 7 | LD Superoxide dismutase (SOD) | 200 bp | 58 | Forward: GAGTTCCGCAACCGTTCCGG  Reverse: TAGTGCACGCGAATCTGGTA |
| 8 | LD Ascorbate peroxidase (APx) | 220 bp | 62 | Forward: ATCCGGGCTCTCCGCGCCGA  Reverse: GCCTTGCGAGGGATGTCGAG |
| 9 | LD α-Tubulin | 220 bp | 60 | Forward: TCGACAATGAGGCCATCTAC  Reverse: GACACCACCGGAGCATAGCT |
| 10 | LD arginase | 230 bp | 57 | Forward: AAATGAGCATTGTGCTGGCG  Reverse: GGTGCATTCCGCGGTCAGGC |
| 11 | Mouse IFN-γ | 230 bp | 58 | Forward: ATGAACGCTACACACTGCAT  Reverse: AGTCTGAGGTAGAAAGAGAT |
| 12 | Mouse iNOS | 128 bp | 58 | Forward: AGGAGGAGAGAGATCCGATTTAG  Reverse: TCAGACTTCCCTGTCTCAGTAG |
| 13 | Mouse IL-10 | 230 bp | 56 | Forward: ATGCCTGGCTCAGCACTGCT  Reverse: TAACCCTTAAAGTCCTGCAT |
| 14 | Mouse GAPDH | 220 bp | 60 | Forward: TGCATCCTGCACCACCAACT  Reverse: TGGGATGACCTTGCCCACAG |
